# Supplementary material
Source: PubMed Central journal article supplement (PMC3535528)
Supplement: NIHMS384106-supplement-Supp_App_S1.pdf [file NIHMS384106-supplement-Supp_App_S1.pdf]

# Online Appendix for Wang and Chen, “On testing an unspecified function through a linear mixed effects model with multiple variance components”

## A1. Proof of Theorem 1

We prove the theorem under the model (5) with  $L = 2$ . We present a spectral decomposition of  $RSS_0$ ,  $RSS_1$ ,  $T_1$  and  $T_2$  through two equivalent models. For simplicity, we suppress  $\gamma$  in the notation of  $\mathbf{V}_0(\gamma)$  and suppress  $\gamma$  and  $\lambda$  in the notation of  $\mathbf{V}_1(\gamma, \lambda)$ . We first consider the case where  $\gamma$  is known and then proceed to estimated  $\gamma$ . Multiplying both sides of (5) by  $\mathbf{V}_0^{-1/2}$  to obtain an equivalent model under the null hypothesis as

$$\tilde{\mathbf{Y}} = \tilde{\mathbf{X}}_0 \boldsymbol{\beta} + \tilde{\boldsymbol{\varepsilon}}_1, \quad \tilde{\boldsymbol{\varepsilon}}_1 \sim N(\mathbf{0}, \sigma_{\boldsymbol{\varepsilon}}^2 \mathbf{I}_n), \quad (\text{A.1})$$

where  $\tilde{\mathbf{Y}} = \mathbf{V}_0^{-1/2} \mathbf{Y}$  and  $\tilde{\mathbf{X}}_0 = \mathbf{V}_0^{-1/2} \mathbf{X}_0$ . Under the alternative hypothesis, the equivalent model is

$$\tilde{\mathbf{Y}} = \tilde{\mathbf{X}}_1 \boldsymbol{\beta} + \tilde{\boldsymbol{\varepsilon}}_2, \quad \tilde{\boldsymbol{\varepsilon}}_2 \sim N(\mathbf{0}, \sigma_{\boldsymbol{\varepsilon}}^2 \tilde{\mathbf{V}}), \quad (\text{A.2})$$

where  $\tilde{\mathbf{X}}_1 = \mathbf{V}_0^{-1/2} \mathbf{X}_1$ ,  $\tilde{\mathbf{V}} = \mathbf{V}_0^{-1/2} \mathbf{V}_1 \mathbf{V}_0^{-1/2} = \mathbf{I}_n + \lambda \tilde{\mathbf{Z}} \boldsymbol{\Sigma}_2 \tilde{\mathbf{Z}}^T$ , and  $\tilde{\mathbf{Z}} = \mathbf{V}_0^{-1/2} \mathbf{Z}_2$ .

Denote  $p = \text{rank}(\tilde{\mathbf{X}}_1)$ . Applying results from Patterson and Thompson (1971) and Kuo (1999) to the equivalent models (A.1) and (A.2), there exists an  $n \times (n - p)$  matrix  $\mathbf{W}$  such that

$$\begin{aligned} \mathbf{W}^T \mathbf{W} &= \mathbf{I}_{n-p}, \quad \mathbf{W} \mathbf{W}^T = \mathbf{I}_n - \tilde{\mathbf{X}}_1 (\tilde{\mathbf{X}}_1^T \tilde{\mathbf{X}}_1)^{-1} \tilde{\mathbf{X}}_1^T, \\ \mathbf{W}^T \tilde{\mathbf{V}} \mathbf{W} &= \mathbf{W}^T (\mathbf{I} + \lambda \tilde{\mathbf{Z}} \boldsymbol{\Sigma}_2 \tilde{\mathbf{Z}}^T) \mathbf{W} = \text{diag}\{1 + \xi_s(\gamma, \lambda)\}, \end{aligned}$$

where

$$\begin{aligned} \xi_s(\gamma, \lambda) &= \text{eigen}_s(\lambda \mathbf{W}^T \tilde{\mathbf{Z}} \boldsymbol{\Sigma}_2 \tilde{\mathbf{Z}}^T \mathbf{W}) \\ &= \lambda \text{eigen}_s(\mathbf{W}^T \mathbf{V}_0^{-1/2} \mathbf{Z}_2 \boldsymbol{\Sigma}_2 \mathbf{Z}_2^T \mathbf{V}_0^{-1/2} \mathbf{W}) \\ &= \lambda \rho_s(\gamma), \end{aligned}$$

$\text{eigen}_s(\mathbf{M})$  denotes the  $s$ th eigenvalue of the matrix  $\mathbf{M}$ , and recall  $\rho_s(\gamma) = \text{eigen}_s(\mathbf{W}^T \tilde{\mathbf{Z}} \Sigma_2 \tilde{\mathbf{Z}}^T \mathbf{W})$ .

To obtain the matrix  $\mathbf{W}$  explicitly, let  $\mathbf{U}\mathbf{D}\mathbf{U}^T$  be the singular value decomposition (SVD) of  $\tilde{\mathbf{P}}_1 = \mathbf{I}_n - \tilde{\mathbf{X}}_1(\tilde{\mathbf{X}}_1^T \tilde{\mathbf{X}}_1)^{-1} \tilde{\mathbf{X}}_1$ , and let  $\mathbf{A} = \mathbf{U}\mathbf{D}^{1/2}$ . Then by the idempotent of  $\tilde{\mathbf{P}}_1$ , we have  $\mathbf{A}\mathbf{A}^T = \tilde{\mathbf{P}}_1$  and  $\mathbf{A}^T \mathbf{A} = \mathbf{I}_{n-p}$ . Let  $\mathbf{U}_1 \mathbf{D}_1 \mathbf{U}_1^T$  be the SVD of  $\mathbf{A}^T \tilde{\mathbf{V}} \mathbf{A}$ , then  $\mathbf{W} = \mathbf{A}\mathbf{U}_1$ . To verify this, note that  $\mathbf{W}\mathbf{W}^T = \mathbf{A}\mathbf{U}_1 \mathbf{U}_1^T \mathbf{A}^T = \mathbf{A}\mathbf{A}^T = \tilde{\mathbf{P}}_1$ ,  $\mathbf{W}^T \mathbf{W} = \mathbf{U}_1^T \mathbf{A}^T \mathbf{A} \mathbf{U}_1 = \mathbf{U}_1^T \mathbf{I}_{n-p} \mathbf{U}_1 = \mathbf{I}_{n-p}$ , and

$$\mathbf{W}^T \tilde{\mathbf{V}} \mathbf{W} = \mathbf{U}_1^T \mathbf{A}^T \tilde{\mathbf{V}} \mathbf{A} \mathbf{U}_1 = \mathbf{U}_1^T \mathbf{U}_1 \mathbf{D}_1 \mathbf{U}_1^T \mathbf{U}_1 = \mathbf{D}_1 = \text{diag}\{1 + \xi_s(\gamma, \lambda)\}. \quad (\text{A.3})$$

We now show the spectral decomposition of  $RSS_0$  and  $RSS_1$ . Let  $\mathbf{H}(\mathbf{X}, \mathbf{V}) \triangleq \mathbf{X}(\mathbf{X}^T \mathbf{V}^{-1} \mathbf{X})^{-1} \mathbf{X}^T \mathbf{V}^{-1}$ . Then we have

$$\begin{aligned} RSS_1(\gamma, \lambda) &= \frac{1}{\sigma_\varepsilon^2} \tilde{\mathbf{Y}}^T \{\mathbf{I} - \mathbf{H}(\tilde{\mathbf{X}}_1, \tilde{\mathbf{V}})\} \tilde{\mathbf{V}}^{-1} \{\mathbf{I} - \mathbf{H}(\tilde{\mathbf{X}}_1, \tilde{\mathbf{V}})\} \tilde{\mathbf{Y}} \\ &= \frac{1}{\sigma_\varepsilon^2} \tilde{\mathbf{Y}}^T \mathbf{W} \text{diag}[\{1 + \lambda \rho_s(\gamma)\}^{-1}] \mathbf{W}^T \tilde{\mathbf{Y}}. \end{aligned}$$

The last step follows from Patterson and Thompson (1971), Kuo (1999) and Crainiceanu and Ruppert (2004). Note that

$$\mathbf{W}^T \tilde{\mathbf{Y}} \sim N(\mathbf{0}, \sigma_\varepsilon^2 \text{diag}\{1 + \lambda_0 \rho_s(\gamma_0)\}),$$

where  $\gamma_0$  and  $\lambda_0$  are the true values of  $\gamma$  and  $\lambda$ . Since under the null specified in (4) we have  $\lambda_0 = \sigma_b^2 / \sigma_\varepsilon^2 = 0$ , it follows that  $\mathbf{W}^T \tilde{\mathbf{Y}} \sim N(\mathbf{0}, \sigma_\varepsilon^2 \mathbf{I}_{n-p})$  under the null. One desirable feature of this decomposition is that the distribution of  $\mathbf{W}^T \tilde{\mathbf{Y}}$  under the null does not depend on the true values of the nuisance parameters  $\theta_0$  or  $\gamma_0$ . Under the null, we have

$$RSS_1 = {}^d \sigma_\varepsilon^2 \sum_{s=1}^{n-p} \frac{1}{1 + \lambda \rho_s(\gamma)} u_s^2, \quad (\text{A.4})$$

where  $u_s$  are independent and identically distributed  $N(0, 1)$  random variables. Under the alternative, we have

$$RSS_1 = {}^d \sigma_\varepsilon^2 \sum_{s=1}^{n-p} \frac{1 + \lambda_0 \rho_s(\gamma_0)}{1 + \lambda \rho_s(\gamma)} u_s^2, \quad u_s \sim \text{i.i.d. } N(0, 1). \quad (\text{A.5})$$

Now we assess  $RSS_0$ . Again using the equivalent models (A.1) and (A.2), we have

$$\begin{aligned}
RSS_0 &= \frac{1}{\sigma_\varepsilon^2} \tilde{\mathbf{Y}}^T \{\mathbf{I} - \mathbf{H}(\tilde{\mathbf{X}}_0, \mathbf{I}_{n-p})\}^T \{\mathbf{I} - \mathbf{H}(\tilde{\mathbf{X}}_0, \mathbf{I}_{n-p})\} \tilde{\mathbf{Y}} \\
&= \frac{1}{\sigma_\varepsilon^2} \tilde{\mathbf{Y}}^T \{\mathbf{I} - \mathbf{H}(\tilde{\mathbf{X}}_1, \mathbf{I}_{n-p}) + \mathbf{H}(\tilde{\mathbf{X}}_1, \mathbf{I}_{n-p}) - \mathbf{H}(\tilde{\mathbf{X}}_0, \mathbf{I}_{n-p})\} \tilde{\mathbf{Y}} \\
&= \frac{1}{\sigma_\varepsilon^2} \tilde{\mathbf{Y}}^T \{\mathbf{I} - \mathbf{H}(\tilde{\mathbf{X}}_1, \mathbf{I}_{n-p})\} \tilde{\mathbf{Y}} + \frac{1}{\sigma_\varepsilon^2} \tilde{\mathbf{Y}}^T \{\mathbf{H}(\tilde{\mathbf{X}}_1, \mathbf{I}_{n-p}) - \mathbf{H}(\tilde{\mathbf{X}}_0, \mathbf{I}_{n-p})\} \tilde{\mathbf{Y}} \\
&= \frac{1}{\sigma_\varepsilon^2} \tilde{\mathbf{Y}}^T \mathbf{W} \mathbf{W}^T \tilde{\mathbf{Y}} \tag{A.6}
\end{aligned}$$

$$+ \frac{1}{\sigma_\varepsilon^2} \tilde{\mathbf{Y}}^T [\{\mathbf{I} - \mathbf{H}(\tilde{\mathbf{X}}_0, \mathbf{I}_{n-p})\} - \{\mathbf{I} - \mathbf{H}(\tilde{\mathbf{X}}_1, \mathbf{I}_{n-p})\}] \tilde{\mathbf{Y}}. \tag{A.7}$$

It is easy to see that the second term (A.7) is the difference of residual sum of squares of least squares fit from two nested models, one with  $\tilde{\mathbf{X}}_0$  as fixed effects and the other with  $\tilde{\mathbf{X}}_1$  as fixed effects. Therefore it is standard to show that

$$\tilde{\mathbf{Y}}^T [\{\mathbf{I} - \mathbf{H}(\tilde{\mathbf{X}}_0, \mathbf{I}_n)\} - \{\mathbf{I} - \mathbf{H}(\tilde{\mathbf{X}}_1, \mathbf{I}_n)\}] \tilde{\mathbf{Y}} =^d \sigma_\varepsilon^2 \sum_{s=1}^{p-q} (\theta_s + v_s)^2,$$

where  $v_s \sim N(0, 1)$ ,  $\theta_s$  is the  $s$ th component of  $\{\mathbf{H}(\tilde{\mathbf{X}}_1, \mathbf{I}_n) - \mathbf{H}(\tilde{\mathbf{X}}_0, \mathbf{I}_n)\} \tilde{\mathbf{X}}_1 \boldsymbol{\beta}$  (see for example, page 50 of Christensen 1996). In other words, (A.7) follows a  $\chi^2$  distribution with degrees of freedom  $p - q$  and noncentrality parameter  $\sum \theta_s^2$ . Under the  $H_0$ , the expectation of  $\tilde{\mathbf{Y}}$  is  $\tilde{\mathbf{X}}_0 \boldsymbol{\beta}_0$ , and by  $\{\mathbf{H}(\tilde{\mathbf{X}}_1, \mathbf{I}_{n-p}) - \mathbf{H}(\tilde{\mathbf{X}}_0, \mathbf{I}_{n-p})\} \tilde{\mathbf{X}}_0 = \mathbf{0}$ , we have  $\boldsymbol{\beta}_0^T \tilde{\mathbf{X}}_0^T \{\mathbf{H}(\tilde{\mathbf{X}}_1, \mathbf{I}_{n-p}) - \mathbf{H}(\tilde{\mathbf{X}}_0, \mathbf{I}_{n-p})\} \tilde{\mathbf{X}}_0 \boldsymbol{\beta}_0 = 0$ . Therefore (A.7) divided by  $\sigma_\varepsilon^2$  follows a  $\chi^2$  with degrees of freedom  $p - q$  and noncentrality parameter zero. Further observe that  $\mathbf{W}^T \tilde{\mathbf{X}}_1 = \mathbf{0}$  and  $\mathbf{W}^T \tilde{\mathbf{X}}_0 = \mathbf{0}$ , we obtain that (A.7) is uncorrelated to (A.6). It follows that under the alternative,

$$RSS_0 =^d \sigma_\varepsilon^2 \left\{ \sum_{s=1}^{n-p} u_s^2 + \sum_{s=1}^{p-q} (\theta_s + v_s)^2 \right\},$$

where  $v_s \sim N(0, 1)$  are independent of  $u_s$ . Under the null, we have

$$RSS_0 =^d \sigma_\varepsilon^2 \left( \sum_{s=1}^{n-p} u_s^2 + \sum_{s=1}^{p-q} v_s^2 \right), \quad u_s \sim^{i.i.d.} N(0, 1), \quad v_s \sim^{i.i.d.} N(0, 1). \tag{A.8}$$

Putting together the spectral decompositions of  $RSS_0$  and  $RSS_1$  and by (6), we arrive at the decomposition for  $T_1$  in (8) of Theorem 1. When  $\gamma$  is unknown but consistently

estimated,  $\widehat{\mathbf{V}}_0^{-1/2} \mathbf{V}_0 \widehat{\mathbf{V}}_0^{-1/2} = \mathbf{I}_n + o_p(1)$ . Therefore the variance of  $\tilde{\mathbf{Y}}$  under the equivalent model (A.1) is approximately  $\sigma_\varepsilon^2 \mathbf{I}$  and under the equivalent model (A.2) is approximately  $\tilde{\mathbf{V}}$ . It follows that replacing  $\gamma_0$  by  $\hat{\gamma}$  in the expression (6), we obtain a spectral representation of  $T_2$  in Theorem 1. Finally, we give the decomposition of the restricted likelihood,  $f_n(\lambda, \gamma)$ , in this Online Appendix A3 which completes the proof of Theorem 1.

## A2. Simultaneous diagonalizing

Here we verify (10). Let  $\mathbf{W}_*$  denote the matrix that simultaneously diagonalizes  $\mathbf{Z}_1 \boldsymbol{\Sigma}_1 \mathbf{Z}_1^T$  and  $\mathbf{Z}_2 \boldsymbol{\Sigma}_2 \mathbf{Z}_2^T$ . That is,  $\mathbf{W}_*^T \mathbf{Z}_2 \boldsymbol{\Sigma}_2 \mathbf{Z}_2^T \mathbf{W}_* = \text{diag}(\mu_s)$ , and  $\gamma \mathbf{W}_*^T \mathbf{Z}_1 \boldsymbol{\Sigma}_1 \mathbf{Z}_1^T \mathbf{W}_* = \gamma \text{diag}(\omega_s)$ . Recall that  $\rho_s(\gamma) = \text{eigen}_s(\mathbf{W}^T \tilde{\mathbf{Z}} \boldsymbol{\Sigma}_2 \tilde{\mathbf{Z}}^T \mathbf{W})$ , it suffices to show

$$\begin{aligned}
\text{eigen}_s(\mathbf{W}^T \tilde{\mathbf{Z}} \boldsymbol{\Sigma}_2 \tilde{\mathbf{Z}}^T \mathbf{W}) &= \text{eigen}_s(\mathbf{W}^T \mathbf{V}_0^{-1/2} \mathbf{Z}_2 \boldsymbol{\Sigma}_2 \mathbf{Z}_2^T \mathbf{V}_0^{-1/2} \mathbf{W}) \\
&= \text{eigen}_s(\mathbf{Z}_2 \boldsymbol{\Sigma}_2 \mathbf{Z}_2^T \mathbf{V}_0^{-1/2} \mathbf{W} \mathbf{W}^T \mathbf{V}_0^{-1/2}) \\
&= \text{eigen}_s[\mathbf{Z}_2 \boldsymbol{\Sigma}_2 \mathbf{Z}_2^T \mathbf{V}_0^{-1/2} \{\mathbf{I} - \mathbf{V}_0^{-1/2} \mathbf{X}_1 (\mathbf{X}_1^T \mathbf{V}_0^{-1} \mathbf{X}_1) \mathbf{X}_1 \mathbf{V}_0^{-1/2}\} \mathbf{V}_0^{-1/2}] \\
&= \text{eigen}_s[\mathbf{Z}_2 \boldsymbol{\Sigma}_2 \mathbf{Z}_2^T \{\mathbf{V}_0^{-1} - \mathbf{V}_0^{-1} \mathbf{X}_1 (\mathbf{X}_1^T \mathbf{V}_0^{-1} \mathbf{X}_1)^{-1} \mathbf{X}_1^T \mathbf{V}_0^{-1}\}] \\
&= \text{eigen}_s[\mathbf{Z}_2 \boldsymbol{\Sigma}_2 \mathbf{Z}_2^T \{\mathbf{I} - \mathbf{H}(\mathbf{X}_1, \mathbf{V}_0)\}^T \mathbf{V}_0^{-1} \{\mathbf{I} - \mathbf{H}(\mathbf{X}_1, \mathbf{V}_0)\}] \\
&= \text{eigen}_s[\mathbf{Z}_2 \boldsymbol{\Sigma}_2 \mathbf{Z}_2^T \mathbf{W}_* \{\text{diag}(1 + \gamma \omega_s)\}^{-1} \mathbf{W}_*^T] \\
&= \text{eigen}_s[\mathbf{W}_*^T \mathbf{Z}_2 \boldsymbol{\Sigma}_2 \mathbf{Z}_2^T \mathbf{W}_* \{\text{diag}(1 + \gamma \omega_s)\}^{-1}] \\
&= \text{eigen}_s[\text{diag}(\mu_s) \{\text{diag}(1 + \gamma \omega_s)\}^{-1}] = \text{diag}\left(\frac{\mu_s}{1 + \gamma \omega_s}\right).
\end{aligned}$$

Here the fourth line is by straightforward matrix algebra and the fifth line is by various properties of  $\mathbf{W}_*$  including that it diagonalizes  $\mathbf{V}_0 = \mathbf{I} + \gamma \mathbf{Z}_1 \boldsymbol{\Sigma}_1 \mathbf{Z}_1^T$  and  $\mathbf{W}_* \mathbf{W}_*^T = \mathbf{I} - \mathbf{H}(\mathbf{X}_1, \mathbf{I})$  (Kuo 1999).

### A3. Spectral decompositions of (restricted) log-likelihood

Under the alternative, the profile log-likelihood is obtained by plugging  $\hat{\beta}_1(\gamma, \lambda)$  into the likelihood, which leads to

$$L(\gamma, \lambda) = -n \log\{RSS_1(\gamma, \lambda)\} - \log|\mathbf{V}_1|.$$

Using (A.4) and a result from Kuo (1999), we obtain that the log-likelihood assuming  $H_a$  has the spectral decomposition

$$L(\gamma, \lambda) = -n \log \left\{ \sum_{s=1}^K \frac{u_s^2}{1 + \lambda \rho_s(\gamma)} + \sum_{s=K+1}^{n-p} u_s^2 \right\} - \sum_{s=1}^K \log\{1 + \lambda \varphi_s(\gamma)\} - \sum_{s=1}^K \log(1 + \gamma \omega_s).$$

Here we used the fact that only  $K$  eigenvalues  $\rho_s(\gamma)$  are non-zero. Using (A.8) it is easy to obtain that the likelihood under the  $H_0$  has the representation

$$L(\gamma, 0) = -n \log \left( \sum_{s=1}^{n-p} u_s^2 + \sum_{s=1}^{p-q} v_s^2 \right) - \sum_{s=1}^K \log(1 + \gamma \omega_s).$$

By the above spectral decompositions of  $L(\gamma, \lambda)$  and  $L(\gamma, 0)$  and some algebra, it follows that  $LRT_1$  has the exact distribution shown in (11). Similar to  $T_2$ , when  $\gamma$  is unknown but can be consistently estimated, the null distribution of  $LRT_2$  can be obtained by

$$n \log \left( 1 + \frac{\sum_{s=1}^{p-q} v_s^2}{\sum_{s=1}^{n-p} u_s^2} \right) + \sup_{\lambda, \gamma} g_n(\gamma, \lambda).$$

Using a result from Kuo (1999), the restricted profile log-likelihood assuming  $H_a$  is

$$\begin{aligned} & RL(\gamma, \lambda) \\ &= -(n-p) \log \left\{ \sum_{s=1}^K \frac{u_s^2}{1 + \lambda \rho_s(\gamma)} + \sum_{s=K+1}^{n-p} u_s^2 \right\} - \sum_{s=1}^K \log\{1 + \lambda \rho_s(\gamma)\} \\ &\quad - \sum_{s=1}^K \log(1 + \gamma \omega_s) - \log(|\mathbf{X}^T \mathbf{X}|), \end{aligned}$$

which is  $f_n(\gamma, \lambda)$  in Theorem 1 aside from a constant. Assuming  $H_0$ , the corresponding restricted log-likelihood is

$$RL(\gamma, 0) = -(n-p)\log\left(\sum_{s=1}^{n-p} u_s^2\right) - \sum_{s=1}^K \log\{1 + \lambda\rho_s(\gamma)\} - \sum_{s=1}^K \log(1 + \gamma\omega_s) - \log(|\mathbf{X}^T \mathbf{X}|).$$

After some algebra, we obtain the null distributions of  $RLRT_1$  and  $RLRT_2$  presented in section 3.3.

#### A4. Additional information on the simulations

This section includes an expansion of Tables 1 and 2 in the main text. Here we report all empirical rejection rates and their confidence intervals (Tables A1 and A2 correspond to Table 1 in the main text, and Tables A3 and A4 correspond to Table 2 in the main text).

## References

- Christensen, R. (1996). Plane answers to complex questions: the theory of linear models. New York: Springer.
- Kuo, B.S. (1999). Asymptotics of ML estimator for regression models with a stochastic trend component. *Econometrics Theory*, 15, 2449.
- Patterson, H.D., and Thompson, R. (1971) Recovery of inter-block information when block sizes are unequal. *Biometrika*, 58, 545-554.

Table A1: Type I error rates and confidence intervals of testing linearity (an unspecified function) or a random effect in five examples, based on 5,000 simulations\*.

| (a) Partially linear model    | $n = 10$             |                      |                      | $n_i = 5$            |                      |                      |
|-------------------------------|----------------------|----------------------|----------------------|----------------------|----------------------|----------------------|
|                               | 0                    | 0.01                 | 0.1                  | 1                    | 10                   | 10                   |
| $\sigma_b$                    |                      |                      |                      |                      |                      |                      |
| Generalized $F$               | 0.052 [0.046, 0.059] | 0.052 [0.046, 0.059] | 0.054 [0.048, 0.060] | 0.053 [0.047, 0.060] | 0.054 [0.048, 0.061] | 0.054 [0.048, 0.061] |
| pseudo-RLRT                   | 0.050 [0.044, 0.056] | 0.049 [0.043, 0.056] | 0.052 [0.046, 0.059] | 0.052 [0.046, 0.059] | 0.054 [0.048, 0.061] | 0.054 [0.048, 0.061] |
| $.5\chi_0^2 + .5\chi_1^2$     | 0.040 [0.034, 0.045] | 0.043 [0.038, 0.049] | 0.043 [0.037, 0.049] | 0.042 [0.037, 0.048] | 0.046 [0.040, 0.052] | 0.046 [0.040, 0.052] |
| (b) Partially linear model    |                      |                      |                      |                      |                      |                      |
| $\sigma_\alpha$               |                      |                      |                      |                      |                      |                      |
| Generalized $F$               | 0.052 [0.046, 0.058] | 0.052 [0.046, 0.058] | 0.048 [0.043, 0.055] | 0.050 [0.044, 0.056] | 0.055 [0.048, 0.061] | 0.055 [0.048, 0.061] |
| pseudo-RLRT                   | 0.050 [0.045, 0.057] | 0.046 [0.041, 0.052] | 0.049 [0.043, 0.055] | 0.055 [0.048, 0.061] | 0.054 [0.048, 0.061] | 0.054 [0.048, 0.061] |
| $.5\chi_2^2 + .5\chi_3^2$     | 0.038 [0.033, 0.044] | 0.035 [0.030, 0.040] | 0.036 [0.031, 0.041] | 0.043 [0.037, 0.049] | 0.040 [0.035, 0.046] | 0.040 [0.035, 0.046] |
| (c) Partially linear model    |                      |                      |                      |                      |                      |                      |
| $\sigma_{\alpha_1}$           |                      |                      |                      |                      |                      |                      |
| Generalized $F$               | 0.050 [0.044, 0.057] | 0.047 [0.041, 0.053] | 0.047 [0.041, 0.053] | 0.052 [0.046, 0.059] | 0.050 [0.044, 0.056] | 0.050 [0.044, 0.056] |
| pseudo-RLRT                   | 0.052 [0.046, 0.059] | 0.047 [0.041, 0.053] | 0.054 [0.048, 0.060] | 0.053 [0.047, 0.060] | 0.058 [0.051, 0.064] | 0.058 [0.051, 0.064] |
| $.5\chi_2^2 + .5\chi_3^2$     | 0.032 [0.027, 0.037] | 0.030 [0.025, 0.034] | 0.031 [0.026, 0.036] | 0.034 [0.029, 0.039] | 0.035 [0.030, 0.040] | 0.035 [0.030, 0.040] |
| (d) Varying coefficient model |                      |                      |                      |                      |                      |                      |
| $\sigma_{b_1}$                |                      |                      |                      |                      |                      |                      |
| Generalized $F$               | 0.052 [0.046, 0.058] | 0.048 [0.042, 0.054] | 0.055 [0.049, 0.062] | 0.053 [0.047, 0.060] | 0.049 [0.044, 0.056] | 0.049 [0.044, 0.056] |
| pseudo-RLRT                   | 0.051 [0.045, 0.057] | 0.050 [0.044, 0.056] | 0.054 [0.048, 0.061] | 0.054 [0.048, 0.061] | 0.053 [0.047, 0.059] | 0.053 [0.047, 0.059] |
| $.5\chi_2^2 + .5\chi_3^2$     | 0.041 [0.035, 0.046] | 0.040 [0.034, 0.045] | 0.043 [0.037, 0.049] | 0.042 [0.037, 0.048] | 0.041 [0.036, 0.047] | 0.041 [0.036, 0.047] |
| (e) Additive model            |                      |                      |                      |                      |                      |                      |
| $\sigma_{b_1}$                |                      |                      |                      |                      |                      |                      |
| Generalized $F$               | 0.049 [0.043, 0.055] | 0.052 [0.046, 0.058] | 0.047 [0.041, 0.053] | 0.055 [0.049, 0.062] | 0.051 [0.045, 0.058] | 0.051 [0.045, 0.058] |
| pseudo-RLRT                   | 0.046 [0.040, 0.052] | 0.046 [0.040, 0.052] | 0.045 [0.039, 0.051] | 0.050 [0.044, 0.056] | 0.054 [0.048, 0.060] | 0.054 [0.048, 0.060] |
| $.5\chi_0^2 + .5\chi_1^2$     | 0.023 [0.019, 0.028] | 0.026 [0.021, 0.030] | 0.026 [0.022, 0.031] | 0.029 [0.024, 0.034] | 0.032 [0.027, 0.037] | 0.032 [0.027, 0.037] |

\*: Entries are empirical rejects rates and their exact 95% confidence intervals.

(a): Testing for the random intercept with a nuisance unspecified function as in example 1.

(b): Testing for an unspecified function with a nuisance random intercept as in example 1.

(c): Testing for an unspecified function with nuisance random intercept and random slope as in example 2.

(d): Testing for a varying coefficient with a nuisance smooth term as in example 3.

(e): Testing for linearity of a smooth additive function with a nuisance smooth term as in example 4;  $corr(t_{i1}, t_{i2})=0.7$ .

Table A2: Type I errors and confidence intervals of testing linearity (an unspecified function) or a random effect in five examples, based on 5,000 simulations\*.

| (a) Partially linear model    | $n = 100$            |                      |                      | $n_i = 5$            |                      |                      |
|-------------------------------|----------------------|----------------------|----------------------|----------------------|----------------------|----------------------|
|                               | 0                    | 0.01                 | 0.1                  | 1                    | 10                   | 10                   |
| Generalized $F$               | 0.054 [0.048, 0.061] | 0.052 [0.046, 0.058] | 0.047 [0.041, 0.053] | 0.053 [0.046, 0.059] | 0.049 [0.044, 0.056] | 0.049 [0.044, 0.056] |
| pseudo-RLRT                   | 0.051 [0.045, 0.058] | 0.050 [0.044, 0.057] | 0.048 [0.042, 0.054] | 0.052 [0.044, 0.056] | 0.050 [0.044, 0.056] | 0.050 [0.044, 0.056] |
| $.5\chi_0^2 + .5\chi_1^2$     | 0.048 [0.042, 0.055] | 0.048 [0.042, 0.054] | 0.045 [0.040, 0.052] | 0.050 [0.044, 0.056] | 0.047 [0.041, 0.053] | 0.047 [0.041, 0.053] |
| (b) Partially linear model    | $n = 100$            |                      |                      | $n_i = 5$            |                      |                      |
| $\sigma_\alpha$               | 0                    | 0.01                 | 0.1                  | 1                    | 10                   | 10                   |
| Generalized $F$               | 0.046 [0.040, 0.052] | 0.050 [0.045, 0.057] | 0.047 [0.041, 0.053] | 0.054 [0.048, 0.060] | 0.048 [0.042, 0.055] | 0.048 [0.042, 0.055] |
| pseudo-LRT                    | 0.040 [0.035, 0.046] | 0.045 [0.039, 0.051] | 0.041 [0.036, 0.047] | 0.048 [0.043, 0.055] | 0.052 [0.046, 0.058] | 0.052 [0.046, 0.058] |
| $.5\chi_2^2 + .5\chi_3^2$     | 0.023 [0.019, 0.028] | 0.025 [0.021, 0.030] | 0.023 [0.019, 0.028] | 0.033 [0.028, 0.038] | 0.033 [0.028, 0.038] | 0.033 [0.028, 0.038] |
| (c) Partially linear model    | $n = 100$            |                      |                      | $n_i = 5$            |                      |                      |
| $\sigma_{\alpha_1}$           | 0                    | 0.01                 | 0.1                  | 1                    | 10                   | 10                   |
| Generalized $F$               | 0.052 [0.046, 0.059] | 0.056 [0.050, 0.063] | 0.050 [0.044, 0.056] | 0.050 [0.045, 0.057] | 0.056 [0.049, 0.062] | 0.056 [0.049, 0.062] |
| pseudo-LRT                    | 0.050 [0.044, 0.056] | 0.050 [0.044, 0.056] | 0.046 [0.040, 0.052] | 0.048 [0.042, 0.055] | 0.055 [0.049, 0.062] | 0.055 [0.049, 0.062] |
| $.5\chi_2^2 + .5\chi_3^2$     | 0.030 [0.025, 0.035] | 0.033 [0.028, 0.038] | 0.029 [0.024, 0.034] | 0.031 [0.026, 0.036] | 0.037 [0.032, 0.042] | 0.037 [0.032, 0.042] |
| (d) Varying coefficient model | $n = 500$            |                      |                      | $n_i = 500$          |                      |                      |
| $\sigma_{b_1}$                | 0                    | 0.01                 | 0.1                  | 1                    | 10                   | 10                   |
| Generalized $F$               | 0.052 [0.046, 0.058] | 0.046 [0.041, 0.052] | 0.048 [0.043, 0.055] | 0.048 [0.042, 0.054] | 0.052 [0.046, 0.059] | 0.052 [0.046, 0.059] |
| pseudo-LRT                    | 0.051 [0.045, 0.057] | 0.052 [0.046, 0.059] | 0.051 [0.045, 0.057] | 0.054 [0.048, 0.060] | 0.049 [0.043, 0.055] | 0.049 [0.043, 0.055] |
| $.5\chi_2^2 + .5\chi_3^2$     | 0.031 [0.026, 0.036] | 0.032 [0.028, 0.038] | 0.031 [0.027, 0.037] | 0.032 [0.027, 0.037] | 0.030 [0.025, 0.035] | 0.030 [0.025, 0.035] |
| (e) Additive model            | $n = 500$            |                      |                      | $n_i = 500$          |                      |                      |
| $\sigma_{b_1}$                | 0                    | 0.01                 | 0.1                  | 1                    | 10                   | 10                   |
| Generalized $F$               | 0.046 [0.040, 0.052] | 0.050 [0.044, 0.057] | 0.051 [0.045, 0.057] | 0.052 [0.046, 0.058] | 0.051 [0.045, 0.057] | 0.051 [0.045, 0.057] |
| pseudo-RLRT                   | 0.039 [0.034, 0.045] | 0.040 [0.035, 0.046] | 0.042 [0.036, 0.048] | 0.050 [0.044, 0.056] | 0.051 [0.045, 0.057] | 0.051 [0.045, 0.057] |
| $.5\chi_0^2 + .5\chi_1^2$     | 0.018 [0.015, 0.022] | 0.019 [0.016, 0.024] | 0.017 [0.014, 0.021] | 0.027 [0.023, 0.032] | 0.027 [0.023, 0.032] | 0.027 [0.023, 0.032] |

\*: Entries are empirical rejects rates and their exact 95% confidence intervals.

(a): Testing for the random intercept with a nuisance unspecified function as in example 1.

(b): Testing for an unspecified function with a nuisance random intercept as in example 1.

(c): Testing for an unspecified function with nuisance random intercept and random slope as in example 2.

(d): Testing for a varying coefficient with a nuisance smooth term as in example 3.

(e): Testing for linearity of a smooth additive function with a nuisance smooth term as in example 4;  $corr(t_{i1}, t_{i2})=0.7$ .

Table A3: Power of and confidence intervals testing linearity (an unspecified function) or a random effect in six examples, based on 1,000 simulations\*.

| (a) Partially linear model    | $n = 10$             |                      |                      | $n_i = 5$            |                      |  |
|-------------------------------|----------------------|----------------------|----------------------|----------------------|----------------------|--|
|                               | 0.3                  | 0.5                  | 0.7                  | 0.8                  | 0.9                  |  |
| $\sigma_\alpha$               |                      |                      |                      |                      |                      |  |
| Generalized $F$               | 0.177 [0.154, 0.202] | 0.469 [0.438, 0.500] | 0.763 [0.735, 0.789] | 0.835 [0.811, 0.857] | 0.905 [0.885, 0.922] |  |
| pseudo-RLRT                   | 0.180 [0.157, 0.205] | 0.461 [0.430, 0.492] | 0.763 [0.735, 0.789] | 0.829 [0.804, 0.852] | 0.904 [0.884, 0.922] |  |
| $.5\chi_0^2 + .5\chi_1^2$     | 0.162 [0.140, 0.186] | 0.423 [0.392, 0.454] | 0.739 [0.711, 0.766] | 0.816 [0.791, 0.840] | 0.891 [0.870, 0.910] |  |
| (b) Partially linear model    |                      |                      |                      |                      |                      |  |
| $d$                           |                      |                      |                      |                      |                      |  |
|                               | 0.3                  | 0.5                  | 0.7                  | 1                    | 1.2                  |  |
| Generalized $F$               | 0.143 [0.122, 0.166] | 0.343 [0.314, 0.373] | 0.596 [0.565, 0.627] | 0.870 [0.848, 0.890] | 0.971 [0.959, 0.980] |  |
| pseudo-LRT                    | 0.143 [0.122, 0.166] | 0.317 [0.288, 0.347] | 0.559 [0.528, 0.590] | 0.793 [0.767, 0.818] | 0.945 [0.929, 0.958] |  |
| $.5\chi_2^2 + .5\chi_3^2$     | 0.106 [0.088, 0.127] | 0.264 [0.237, 0.292] | 0.505 [0.474, 0.536] | 0.745 [0.717, 0.772] | 0.929 [0.911, 0.944] |  |
| (c) Partially linear model    |                      |                      |                      |                      |                      |  |
| $\sigma_b$                    |                      |                      |                      |                      |                      |  |
|                               | 0.1                  | 0.3                  | 0.5                  | 0.7                  | 1.5                  |  |
| Generalized $F$               | 0.408 [0.377, 0.439] | 0.576 [0.545, 0.607] | 0.725 [0.696, 0.752] | 0.830 [0.805, 0.853] | 0.959 [0.945, 0.970] |  |
| pseudo-LRT                    | 0.465 [0.434, 0.496] | 0.599 [0.568, 0.630] | 0.748 [0.720, 0.775] | 0.826 [0.801, 0.849] | 0.940 [0.923, 0.954] |  |
| $.5\chi_2^2 + .5\chi_3^2$     | 0.400 [0.369, 0.431] | 0.554 [0.523, 0.585] | 0.706 [0.677, 0.734] | 0.796 [0.770, 0.820] | 0.935 [0.918, 0.949] |  |
| (d) Varying coefficient model |                      |                      |                      |                      |                      |  |
| $d$                           |                      |                      |                      |                      |                      |  |
|                               | 0.2                  | 0.4                  | 0.6                  | 0.8                  | 1                    |  |
| Generalized $F$               | 0.088 [0.071, 0.107] | 0.244 [0.218, 0.272] | 0.490 [0.459, 0.521] | 0.789 [0.762, 0.814] | 0.922 [0.904, 0.938] |  |
| pseudo-LRT                    | 0.089 [0.072, 0.108] | 0.244 [0.218, 0.272] | 0.438 [0.407, 0.469] | 0.721 [0.692, 0.749] | 0.855 [0.832, 0.876] |  |
| $.5\chi_2^2 + .5\chi_3^2$     | 0.071 [0.056, 0.089] | 0.221 [0.196, 0.248] | 0.394 [0.364, 0.425] | 0.677 [0.647, 0.706] | 0.830 [0.805, 0.853] |  |
| (e) Varying coefficient model |                      |                      |                      |                      |                      |  |
| $d$                           |                      |                      |                      |                      |                      |  |
|                               | 0.2                  | 0.5                  | 0.7                  | 0.8                  | 1                    |  |
| Generalized $F$               | 0.103 [0.085, 0.124] | 0.404 [0.373, 0.435] | 0.652 [0.622, 0.682] | 0.839 [0.815, 0.861] | 0.931 [0.913, 0.946] |  |
| pseudo-LRT                    | 0.121 [0.101, 0.143] | 0.429 [0.398, 0.460] | 0.688 [0.658, 0.717] | 0.835 [0.811, 0.857] | 0.938 [0.921, 0.952] |  |
| $.5\chi_2^2 + .5\chi_3^2$     | 0.101 [0.083, 0.121] | 0.389 [0.359, 0.420] | 0.650 [0.620, 0.680] | 0.813 [0.787, 0.837] | 0.930 [0.912, 0.945] |  |
| (f) Additive model            |                      |                      |                      |                      |                      |  |
| $\sigma_{b_2}$                |                      |                      |                      |                      |                      |  |
|                               | 2                    | 3                    | 5                    | 8                    | 12                   |  |
| Generalized $F$               | 0.270 [0.243, 0.299] | 0.459 [0.428, 0.490] | 0.664 [0.634, 0.693] | 0.812 [0.786, 0.836] | 0.932 [0.915, 0.947] |  |
| pseudo-RLRT                   | 0.266 [0.239, 0.295] | 0.454 [0.423, 0.485] | 0.651 [0.621, 0.681] | 0.808 [0.782, 0.832] | 0.925 [0.907, 0.941] |  |
| $.5\chi_0^2 + .5\chi_1^2$     | 0.206 [0.181, 0.232] | 0.404 [0.373, 0.435] | 0.590 [0.559, 0.621] | 0.777 [0.750, 0.802] | 0.909 [0.889, 0.926] |  |

\*: Entries are empirical rejects rates and their exact 95% confidence intervals.

(a): Testing for the random intercept with a nuisance unspecified function as in example 1.

(b): Testing for an unspecified function with a nuisance random intercept as in example 1.

(c): Testing for an unspecified function with nuisance random intercept and random slope as in example 2.

(d): Testing for a varying coefficient with a nuisance smooth term as in example 3, sine function.

(e): Testing for a varying coefficient with a nuisance smooth term as in example 3, polynomial function.

(f): Testing for linearity of a smooth additive function with a nuisance smooth term as in example 4;  $corr(t_{i1}, t_{i2})=0.7$ .

Table A4: Power and confidence intervals of testing linearity (an unspecified function) or a random effect in six examples, based on 1,000 simulations\*.

| (a) Partially linear model    | $n = 100$            |                      |                      | $n_i = 5$            |                      |  |
|-------------------------------|----------------------|----------------------|----------------------|----------------------|----------------------|--|
|                               | 0.15                 | 0.2                  | 0.25                 | 0.3                  | 0.35                 |  |
| $\sigma_\alpha$               |                      |                      |                      |                      |                      |  |
| Generalized $F$               | 0.165 [0.143, 0.189] | 0.308 [0.279, 0.338] | 0.551 [0.520, 0.582] | 0.778 [0.751, 0.803] | 0.916 [0.897, 0.932] |  |
| pseudo-RLRT                   | 0.168 [0.145, 0.193] | 0.321 [0.292, 0.351] | 0.554 [0.523, 0.585] | 0.789 [0.762, 0.814] | 0.913 [0.894, 0.930] |  |
| $.5\chi_0^2 + .5\chi_1^2$     | 0.159 [0.137, 0.183] | 0.306 [0.278, 0.336] | 0.541 [0.510, 0.572] | 0.779 [0.752, 0.804] | 0.910 [0.891, 0.930] |  |
| (b) Partially linear model    |                      |                      |                      |                      |                      |  |
| $d$                           |                      |                      |                      |                      |                      |  |
|                               | 0.1                  | 0.15                 | 0.2                  | 0.25                 | 0.3                  |  |
| Generalized $F$               | 0.171 [0.148, 0.196] | 0.333 [0.304, 0.363] | 0.608 [0.577, 0.638] | 0.805 [0.779, 0.829] | 0.927 [0.909, 0.942] |  |
| pseudo-LRT                    | 0.162 [0.140, 0.186] | 0.309 [0.280, 0.339] | 0.533 [0.502, 0.564] | 0.704 [0.675, 0.732] | 0.887 [0.866, 0.906] |  |
| $.5\chi_2^2 + .5\chi_3^2$     | 0.114 [0.095, 0.135] | 0.243 [0.217, 0.271] | 0.462 [0.431, 0.493] | 0.640 [0.609, 0.670] | 0.839 [0.815, 0.861] |  |
| (c) Partially linear model    |                      |                      |                      |                      |                      |  |
| $\sigma_b$                    |                      |                      |                      |                      |                      |  |
|                               | 0.1                  | 0.2                  | 0.3                  | 0.5                  | 1                    |  |
| Generalized $F$               | 0.321 [0.292, 0.351] | 0.588 [0.557, 0.619] | 0.737 [0.709, 0.764] | 0.868 [0.845, 0.888] | 0.973 [0.961, 0.982] |  |
| pseudo-LRT                    | 0.365 [0.335, 0.396] | 0.606 [0.575, 0.636] | 0.736 [0.708, 0.763] | 0.855 [0.832, 0.876] | 0.949 [0.933, 0.962] |  |
| $.5\chi_2^2 + .5\chi_3^2$     | 0.305 [0.277, 0.335] | 0.568 [0.537, 0.599] | 0.705 [0.676, 0.733] | 0.838 [0.814, 0.860] | 0.941 [0.925, 0.955] |  |
| (d) Varying coefficient model |                      |                      |                      |                      |                      |  |
| $d$                           |                      |                      |                      |                      |                      |  |
|                               | 0.1                  | 0.15                 | 0.2                  | 0.25                 | 0.3                  |  |
| Generalized $F$               | 0.185 [0.161, 0.210] | 0.394 [0.364, 0.425] | 0.651 [0.621, 0.681] | 0.866 [0.843, 0.887] | 0.943 [0.927, 0.957] |  |
| pseudo-LRT                    | 0.174 [0.151, 0.199] | 0.367 [0.337, 0.398] | 0.549 [0.518, 0.580] | 0.791 [0.764, 0.816] | 0.887 [0.866, 0.906] |  |
| $.5\chi_2^2 + .5\chi_3^2$     | 0.127 [0.107, 0.149] | 0.297 [0.269, 0.326] | 0.470 [0.439, 0.501] | 0.722 [0.693, 0.750] | 0.848 [0.824, 0.870] |  |
| (e) Varying coefficient model |                      |                      |                      |                      |                      |  |
| $d$                           |                      |                      |                      |                      |                      |  |
|                               | 0.1                  | 0.15                 | 0.2                  | 0.25                 | 0.3                  |  |
| Generalized $F$               | 0.193 [0.169, 0.219] | 0.446 [0.415, 0.477] | 0.717 [0.688, 0.745] | 0.907 [0.887, 0.924] | 0.985 [0.975, 0.992] |  |
| pseudo-LRT                    | 0.220 [0.195, 0.247] | 0.459 [0.428, 0.490] | 0.743 [0.715, 0.770] | 0.907 [0.887, 0.924] | 0.980 [0.969, 0.988] |  |
| $.5\chi_2^2 + .5\chi_3^2$     | 0.158 [0.136, 0.182] | 0.396 [0.366, 0.427] | 0.677 [0.647, 0.706] | 0.874 [0.852, 0.894] | 0.969 [0.956, 0.979] |  |
| (f) Additive model            |                      |                      |                      |                      |                      |  |
| $\sigma_{b_2}$                |                      |                      |                      |                      |                      |  |
|                               | 0.1                  | 0.3                  | 0.5                  | 1                    | 2                    |  |
| Generalized $F$               | 0.086 [0.069, 0.105] | 0.331 [0.302, 0.361] | 0.546 [0.515, 0.577] | 0.831 [0.806, 0.854] | 0.967 [0.954, 0.977] |  |
| pseudo-RLRT                   | 0.083 [0.067, 0.102] | 0.343 [0.314, 0.373] | 0.540 [0.509, 0.571] | 0.819 [0.794, 0.842] | 0.958 [0.944, 0.970] |  |
| $.5\chi_0^2 + .5\chi_1^2$     | 0.048 [0.036, 0.063] | 0.279 [0.251, 0.308] | 0.475 [0.444, 0.506] | 0.794 [0.768, 0.819] | 0.952 [0.937, 0.964] |  |

\*: Entries are empirical rejects rates and their exact 95% confidence intervals.

(a): Testing for the random intercept with a nuisance unspecified function as in example 1.

(b): Testing for an unspecified function with a nuisance random intercept as in example 1.

(c): Testing for an unspecified function with nuisance random intercept and random slope as in example 2.

(d): Testing for a varying coefficient with a nuisance smooth term as in example 3, sine function.

(e): Testing for a varying coefficient with a nuisance smooth term as in example 3, polynomial function.

(f): Testing for linearity of a smooth additive function with a nuisance smooth term as in example 4;  $corr(t_{i_1}, t_{i_2})=0.7$ .
